# Supplementary material for: Barium molybdate up-conversion nanoscale particles with IR-LED chip, temperature sensing, and anti-counterfeiting applications
Source: Royal Society of Chemistry journal article supplement (doi:10.1039/d4nr01302f), 2024-01-01
Supplement: d4nr01302f1.pdf [file d4nr01302f1.pdf]

## **Barium Molybdate Up-Conversion Nanoscale Particle with IR-LED chip, Temperature Sensing, and Anti-Counterfeiting Applications**

Jae Yong Jung<sup>1</sup>, Jin Young Park<sup>2</sup>, Woo Tae Hong<sup>1</sup>, Soung Soo Yi<sup>3</sup>, Hyun Kyoung Yang<sup>1,2\*</sup>

*<sup>1</sup>Marine-Bionics convergence technology center, Pukyong National University, Busan 48513,  
Republic of Korea*

*<sup>2</sup>Department of Electrical, Electronics and Software Engineering, Pukyong National University,  
Busan 48513, Republic of Korea*

*<sup>3</sup>Division of Materials Science and Engineering, Silla University, Busan 46958, Korea*

\*Corresponding author e-mail: [hkyang@pknu.ac.kr](mailto:hkyang@pknu.ac.kr)

Tel: +82-51-629-6868

**BaMoO<sub>4</sub>:[Er<sup>3+</sup>]/ [Yb<sup>3+</sup>] powder**

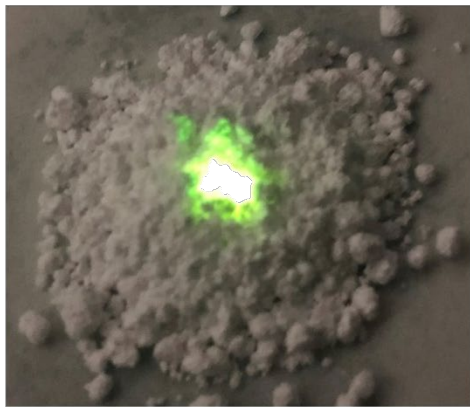

**Mixed**

**PDMS**

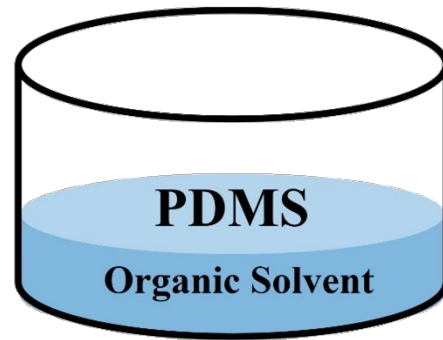

**Casting & Cure**

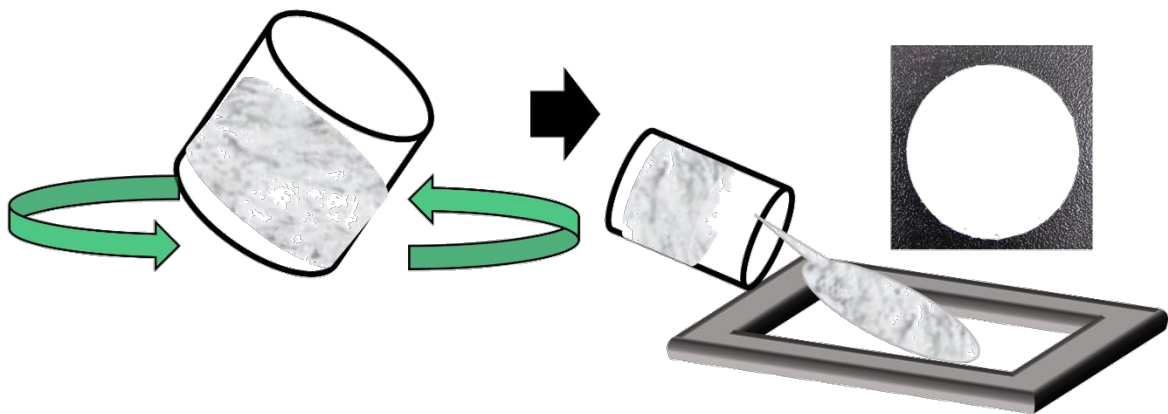

**Figure S1.** Schematic of fabricated flexible composite process.

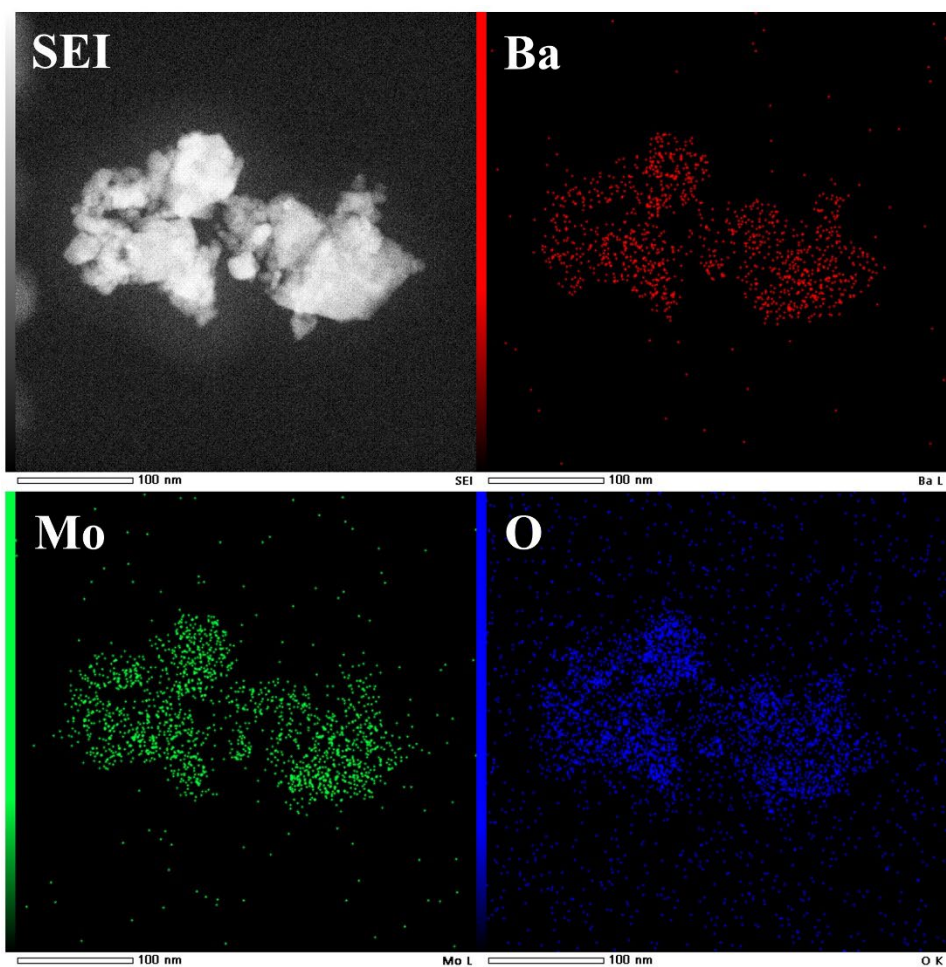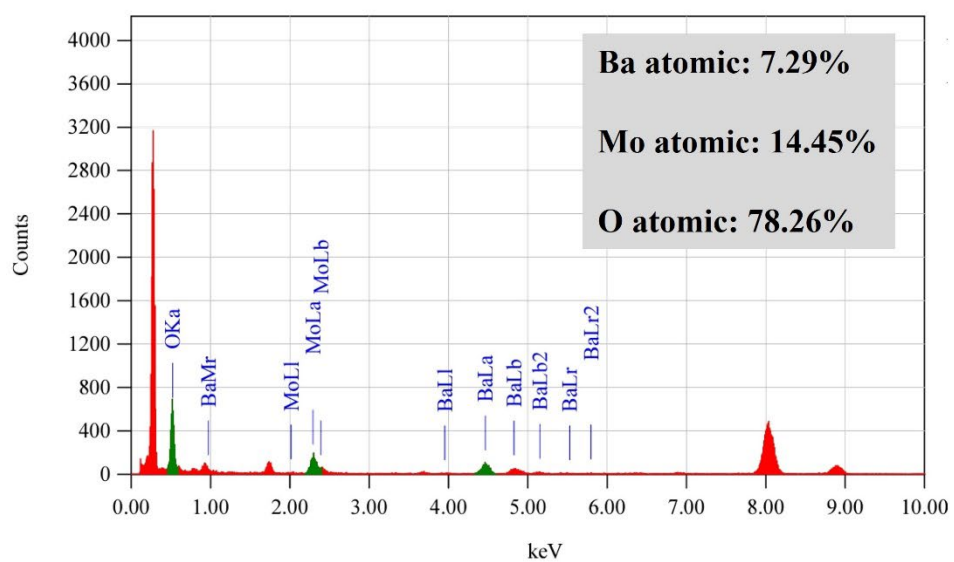

**Figure S2.** TEM-EDS mapping analysis of pristine BaMoO<sub>4</sub>.

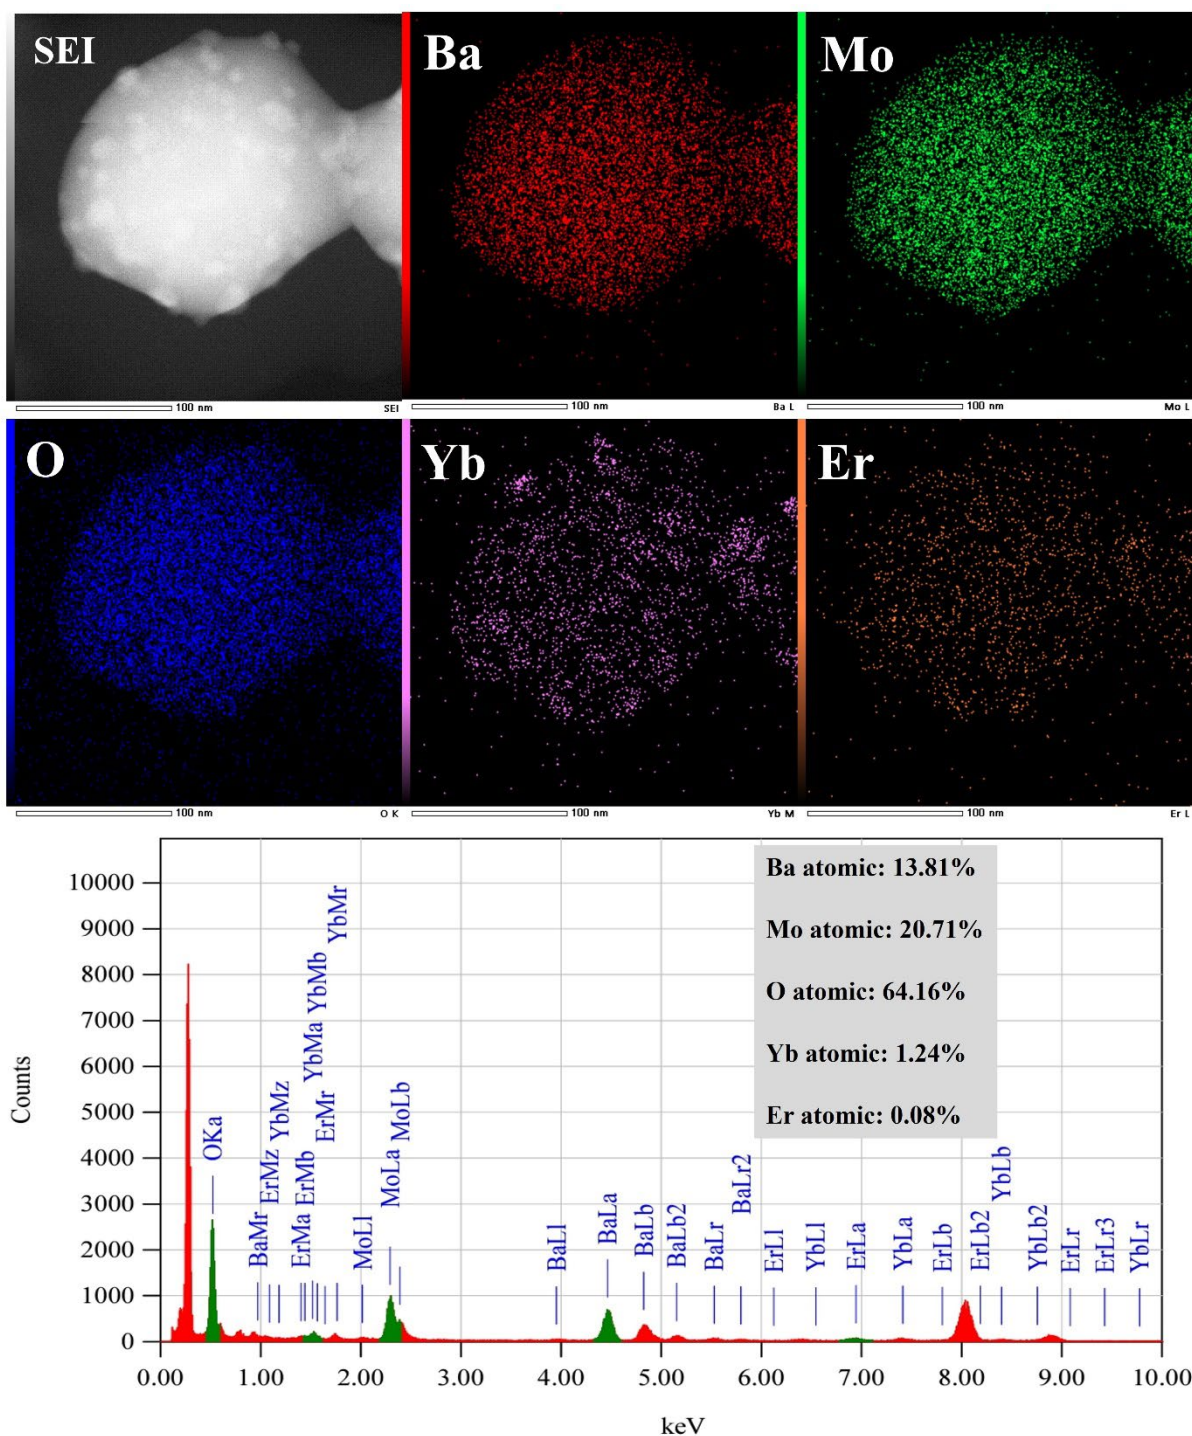

**Figure S3.** TEM-EDS mapping analysis of  $\text{BaMoO}_4\text{:}[\text{Er}^{3+}]/[\text{Yb}^{3+}]$ .

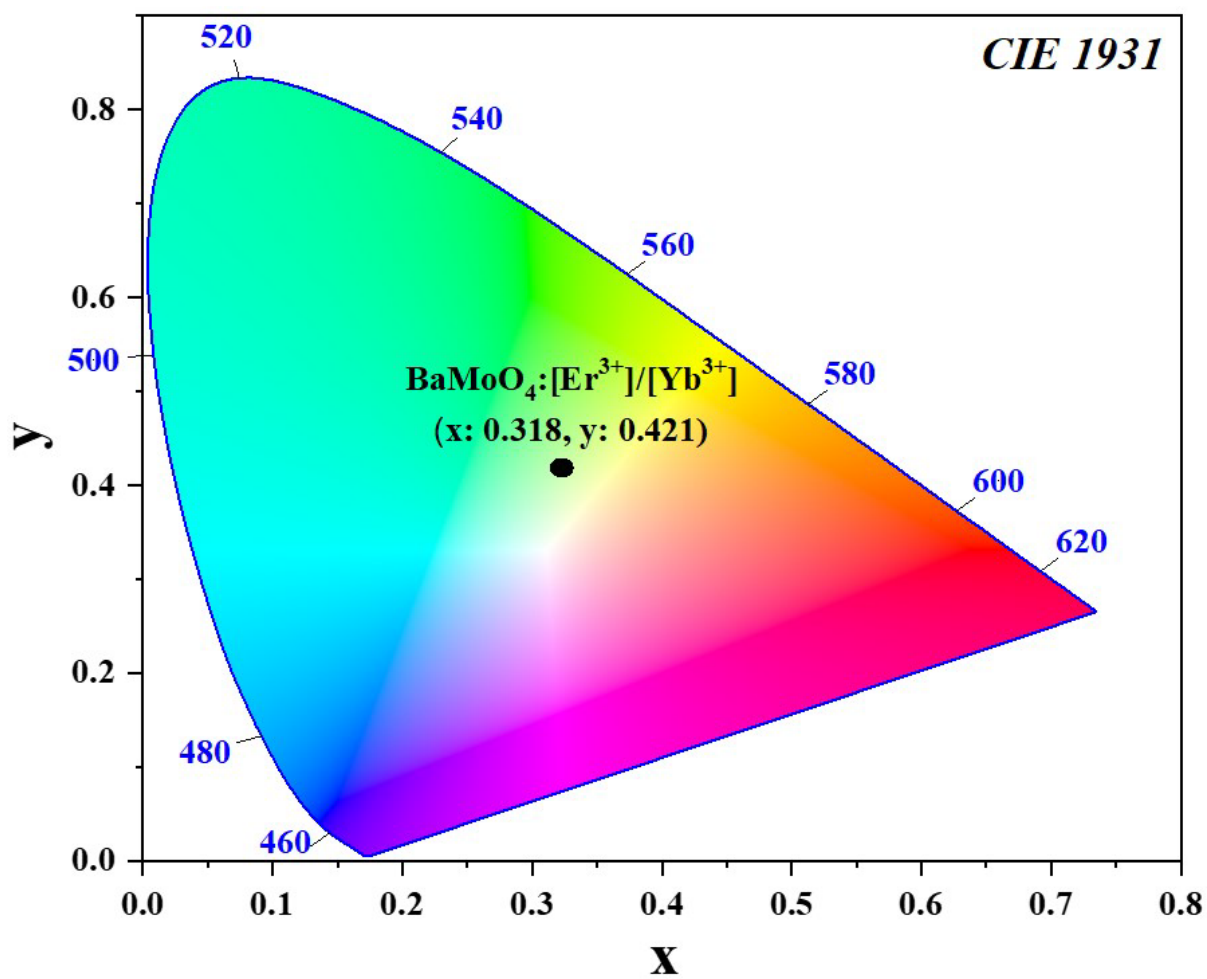

**Figure S4.** CIE coordinates x: 0.318 and y: 0.421 of  $\text{BaMoO}_4:[\text{Er}^{3+}]/[\text{Yb}^{3+}]$ .
